# Supplementary material for: Whole-body tomographic fluorescence lifetime imaging of PD-L1 expression
Source: Research Square preprint supplement (doi:10.21203/rs.3.rs-9682833/v1), 2026-06-03

Supplementary Figure 1


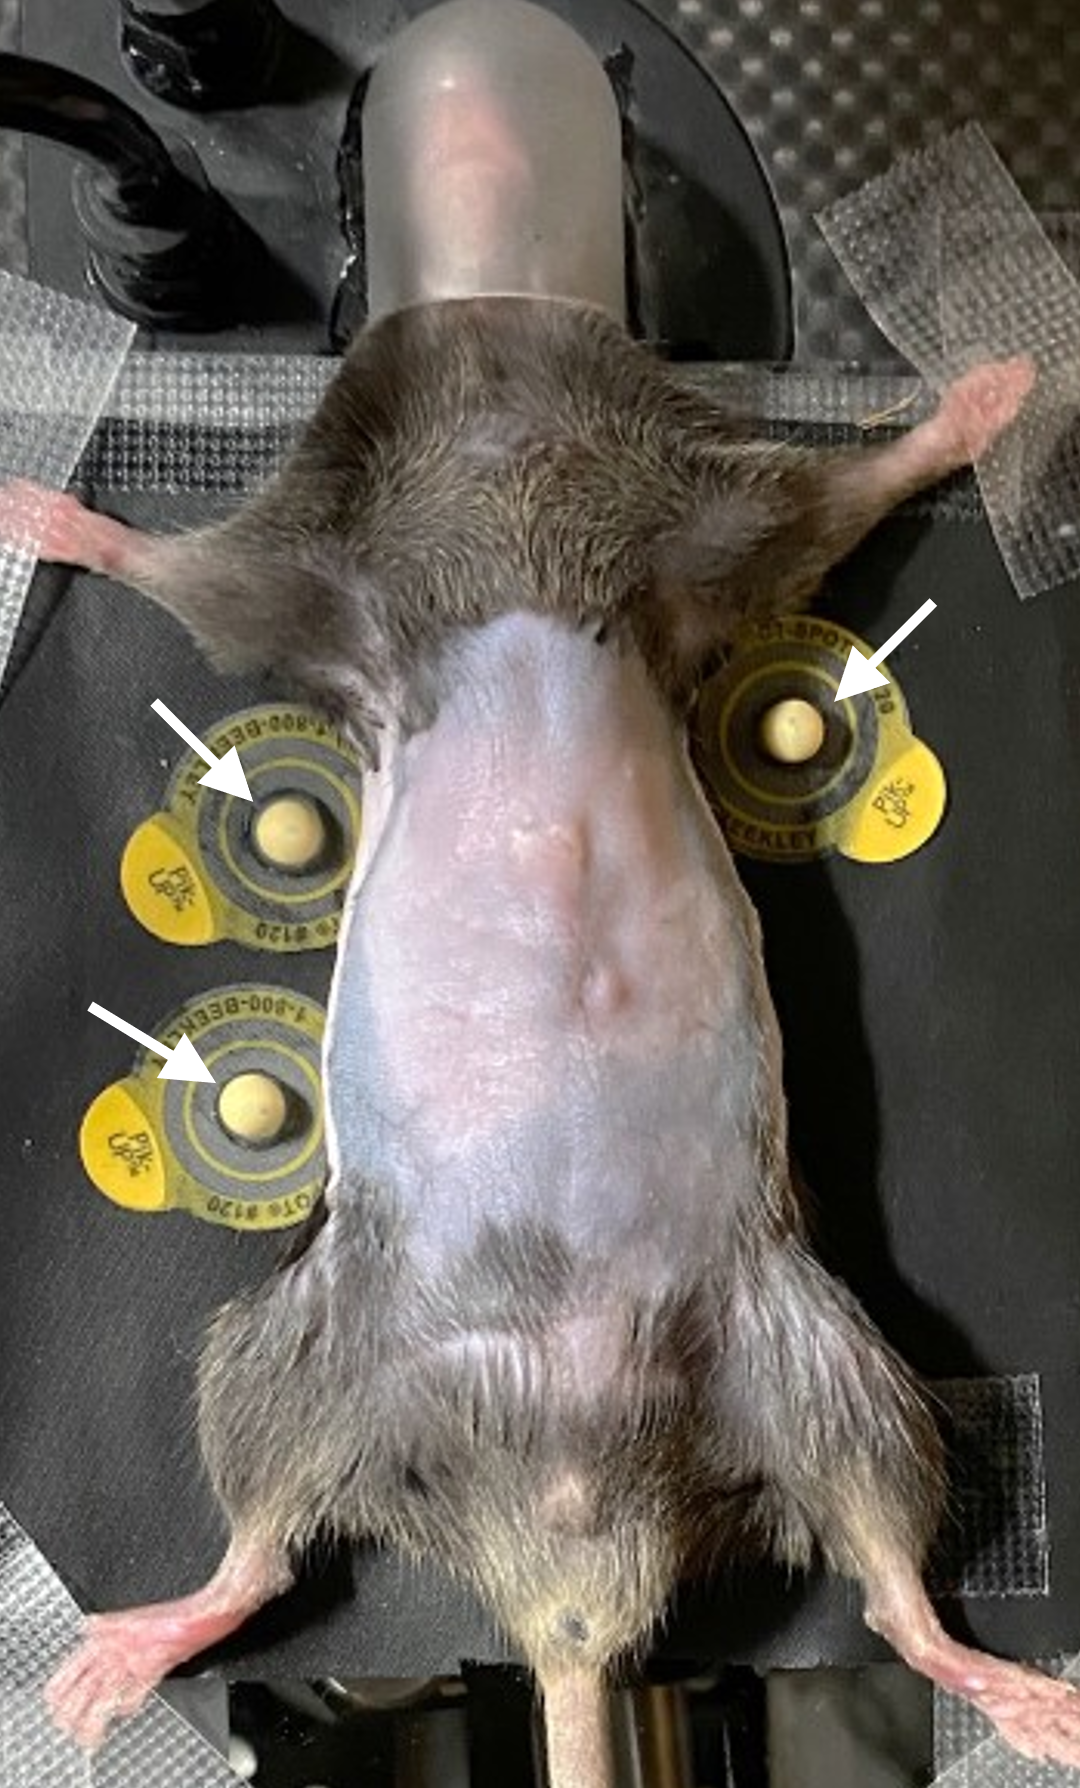


**Supplementary Figure 1:** Photograph of a representative mouse under anesthesia and on the imaging stage. The torso was shaved by applying a thin layer of Nair on both the dorsal and ventral surfaces. The ventral surface is facing the camera. The arrows indicated the locations of three CT fiducials.

**Supplementary Table 1:** *In situ* fluorescence intensity data


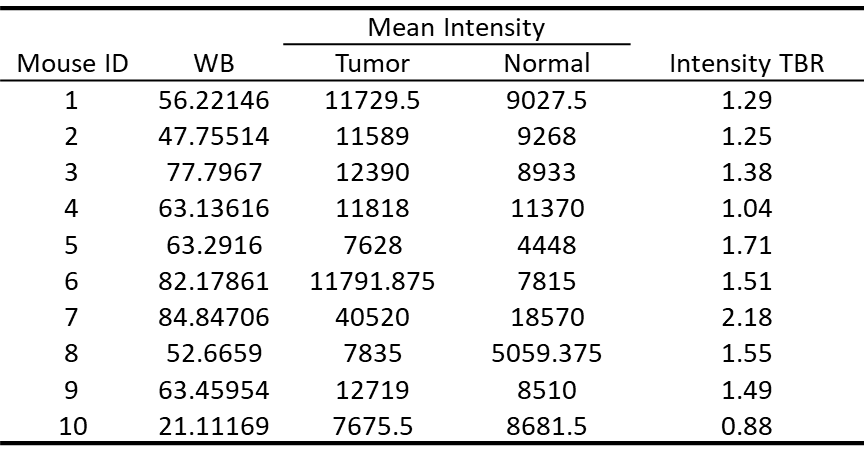


**Supplementary Table 2:** *In situ* FLT data


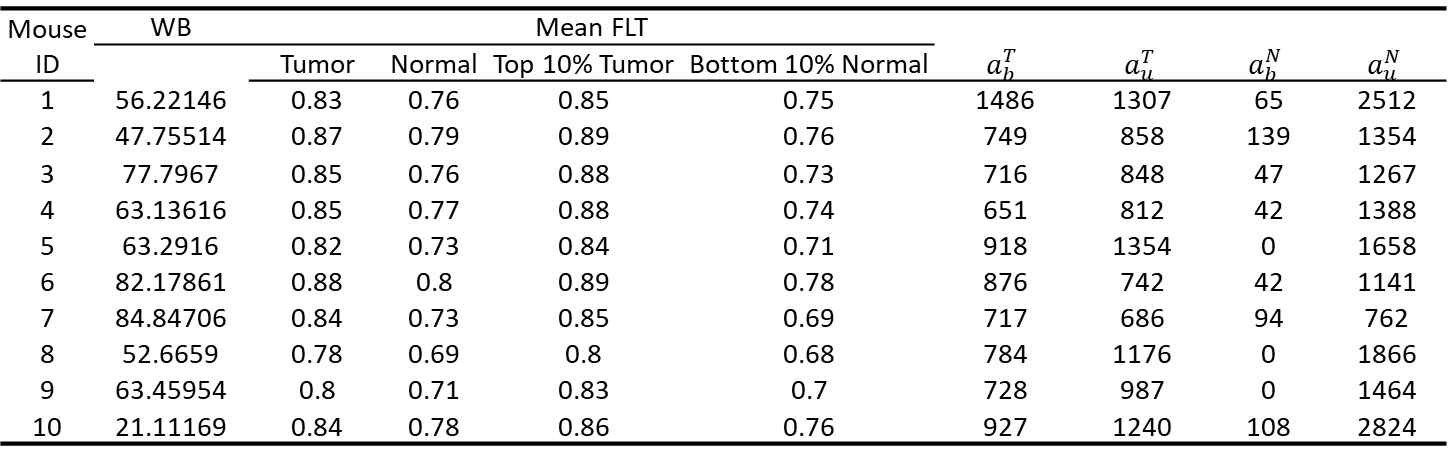

Supplement: Supplementary file 1 [file 572b6ae1f72b5fd863f6d1ef.docx]
